# Supplementary material for: LSD1 prevents aberrant heterochromatin formation in Neurospora crassa
Source: PubMed Central journal article supplement — Nucleic Acids Res. 2020 Sep 18;48(18):10199–210. doi: 10.1093/nar/gkaa724 (PMC7544195; doi:10.1093/nar/gkaa724), 2020-09-18
Supplement: gkaa724_supplemental_file.pdf [file gkaa724_supplemental_file.pdf]

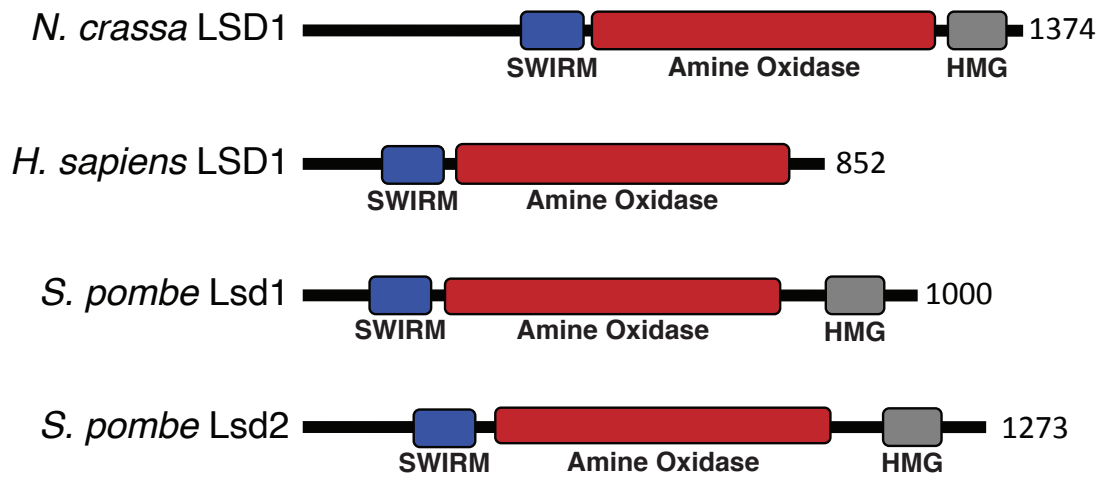

Supplemental Figure 1

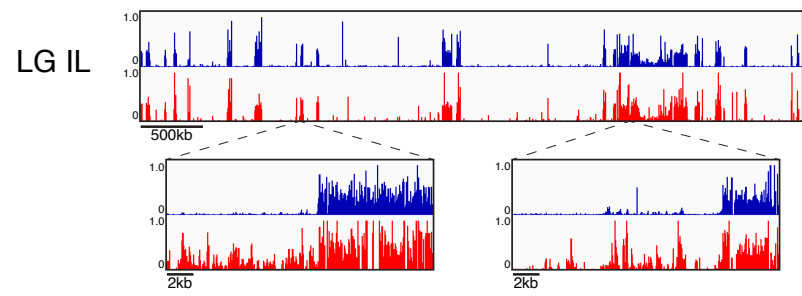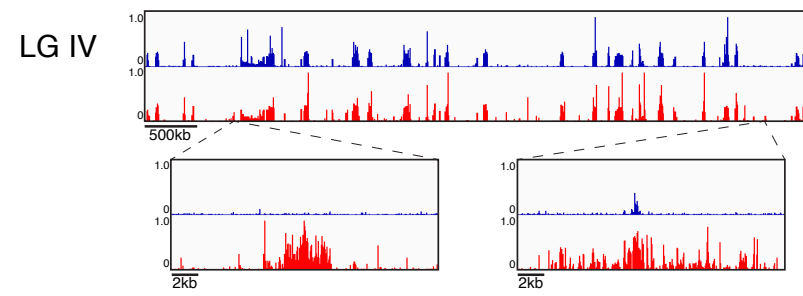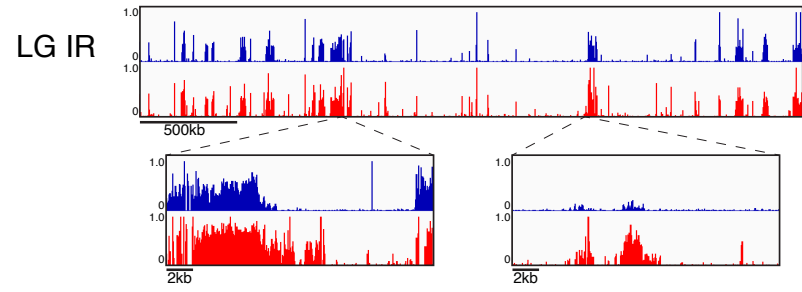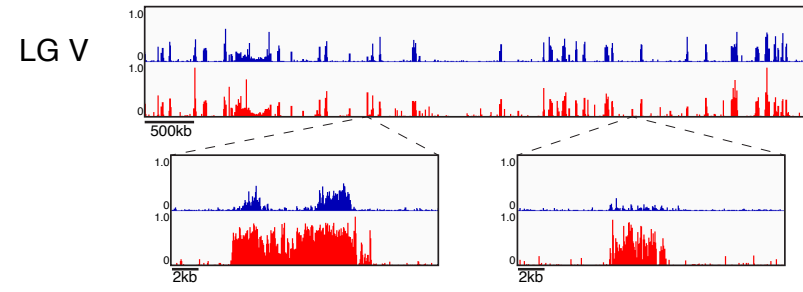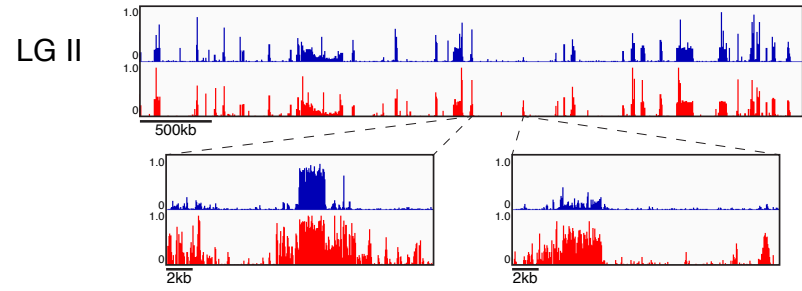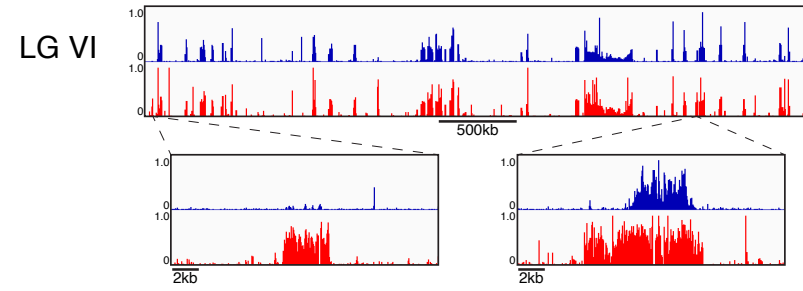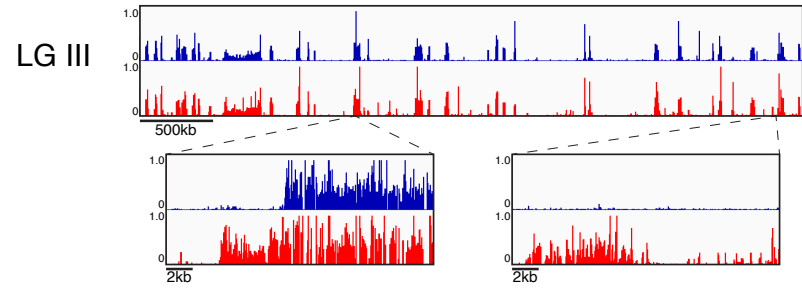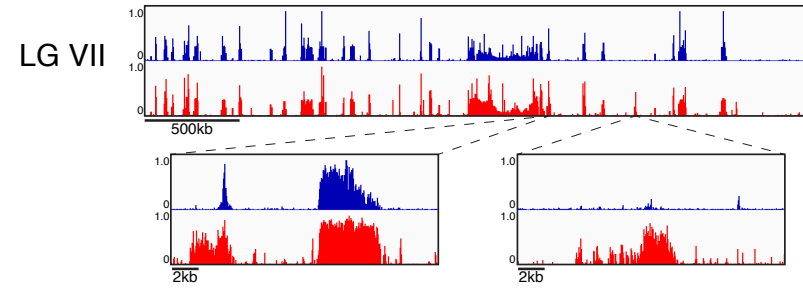

Supplemental Figure 2

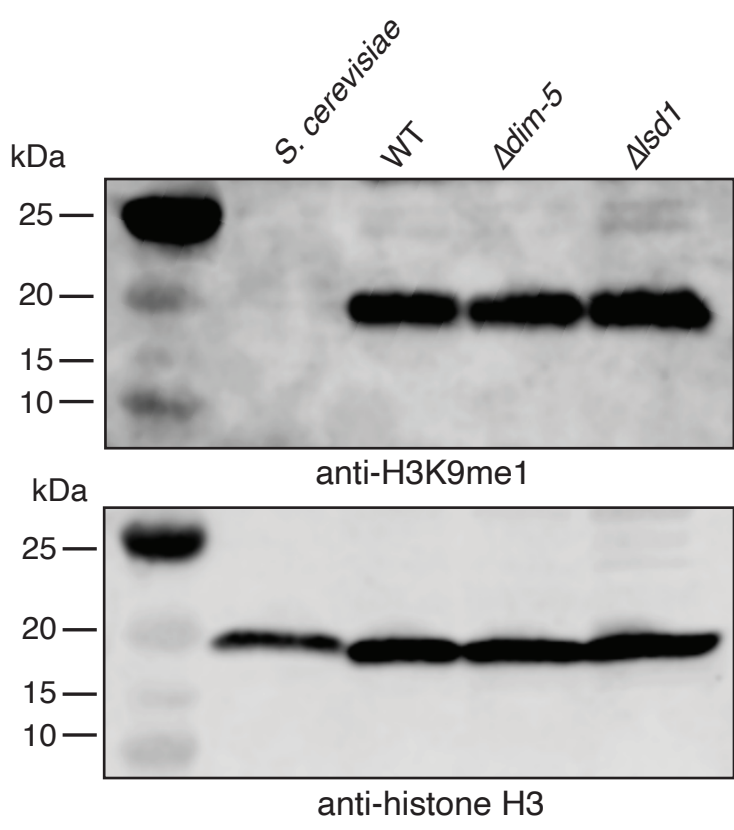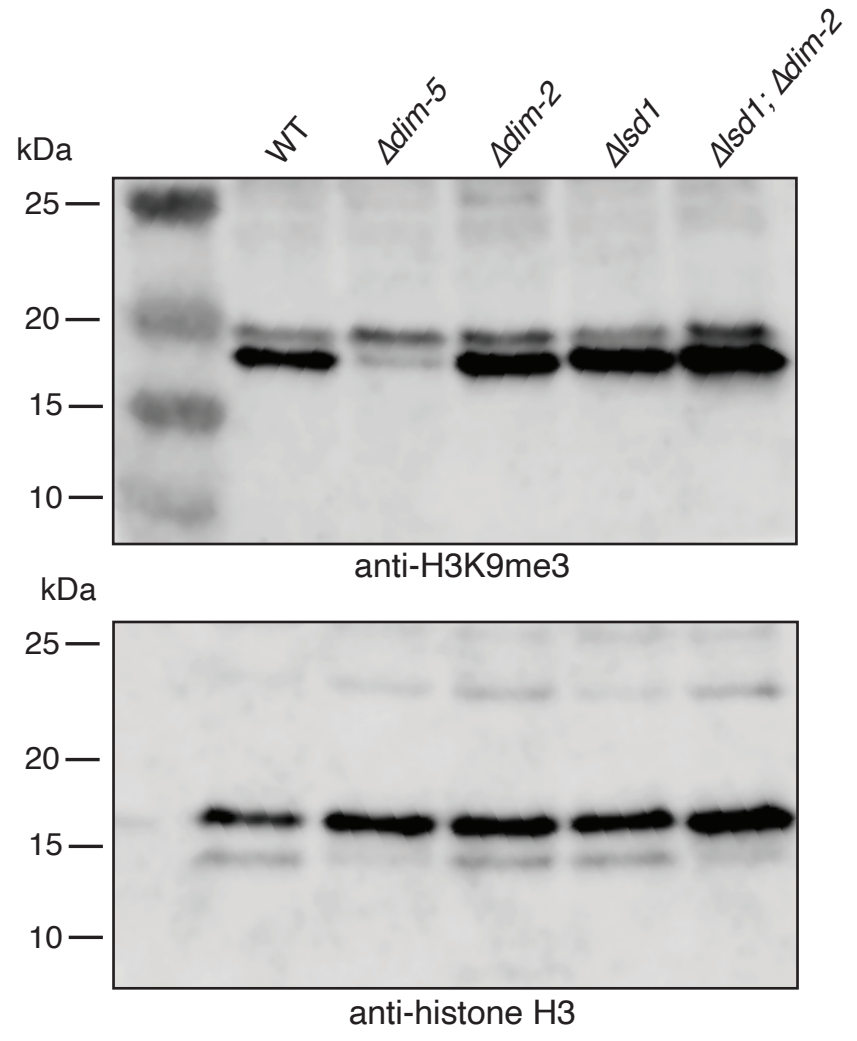

Supplemental Figure 3

**A**

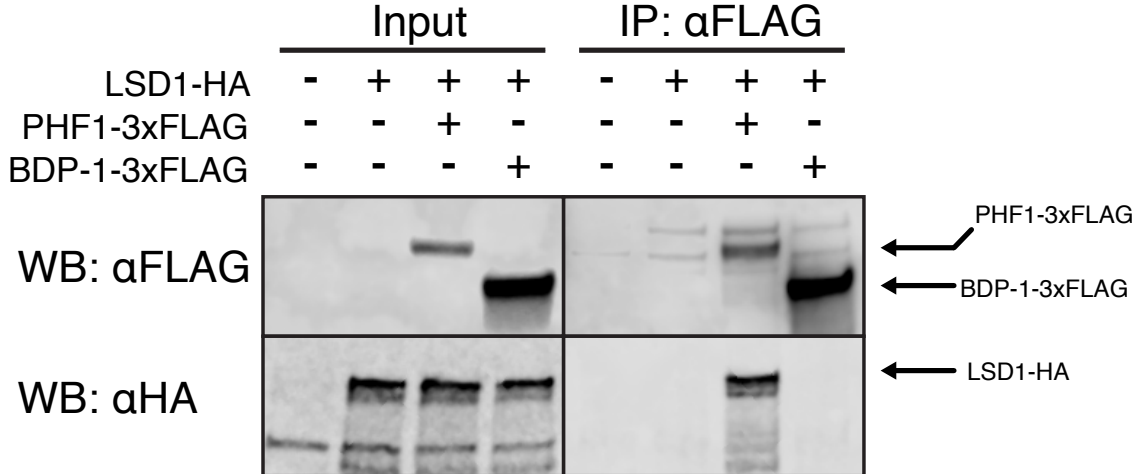

**B**

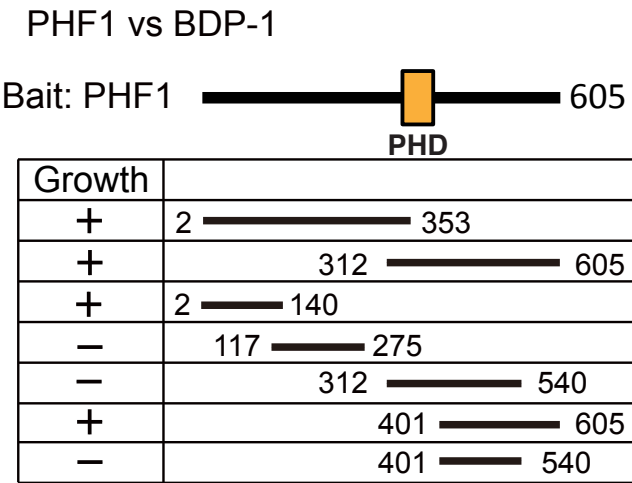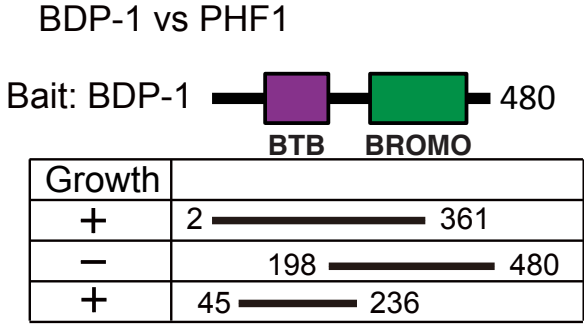

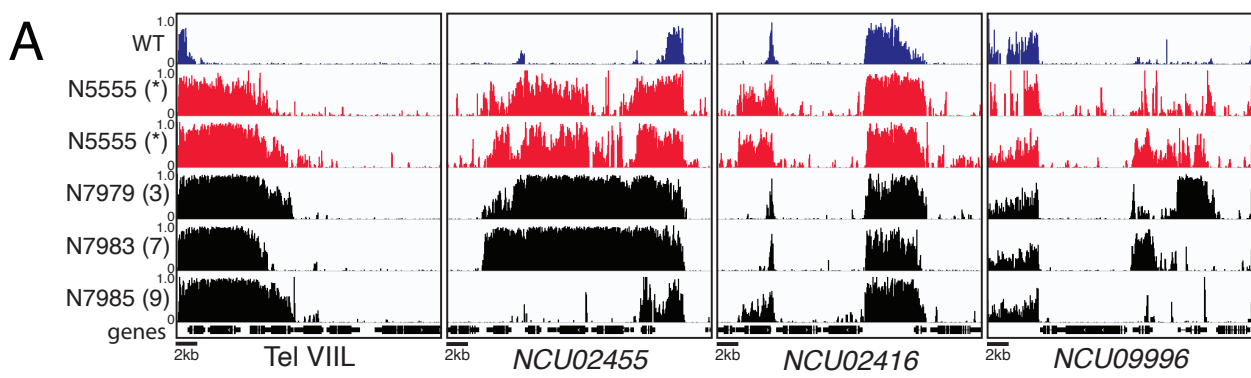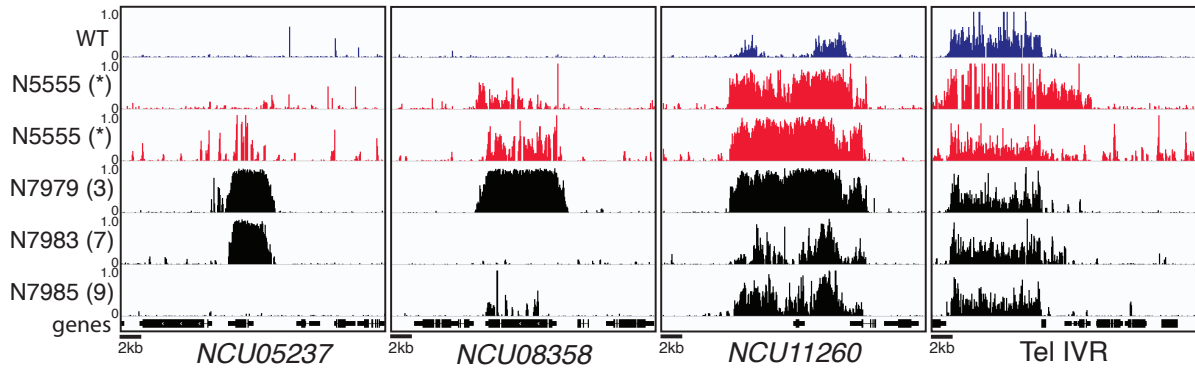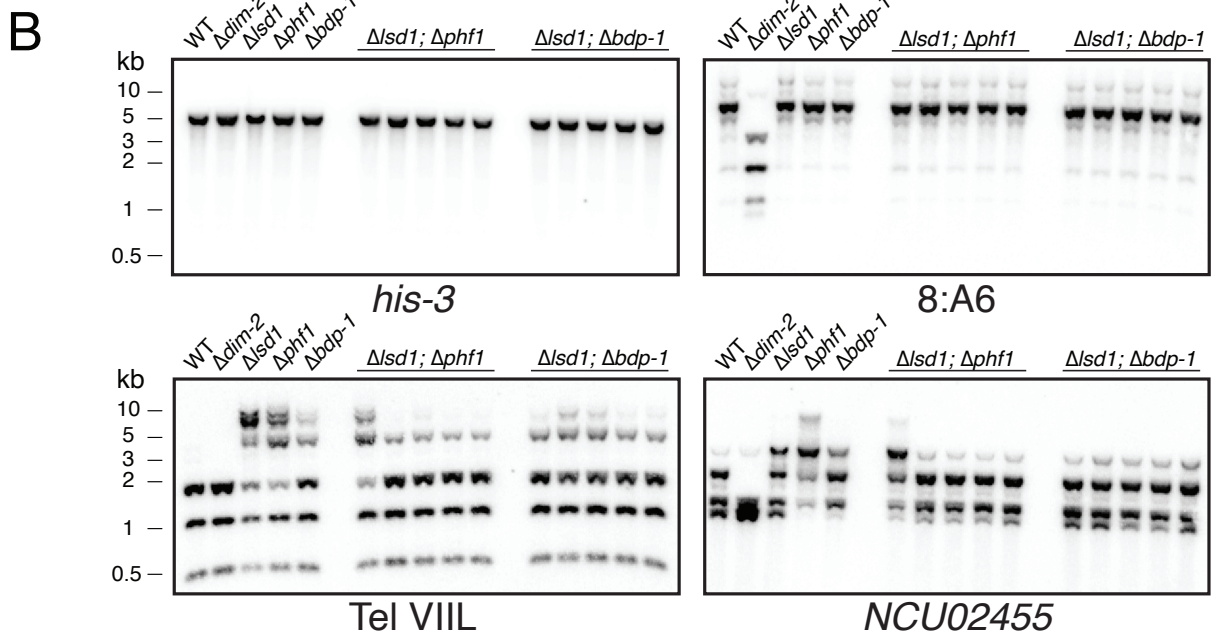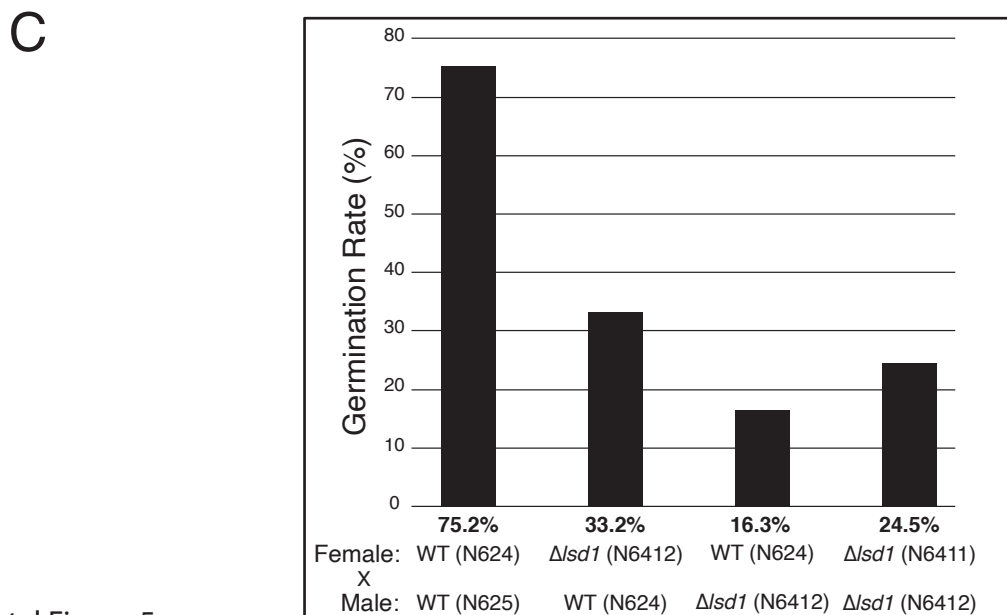

A

## H3K9me3 ChIP-qPCR

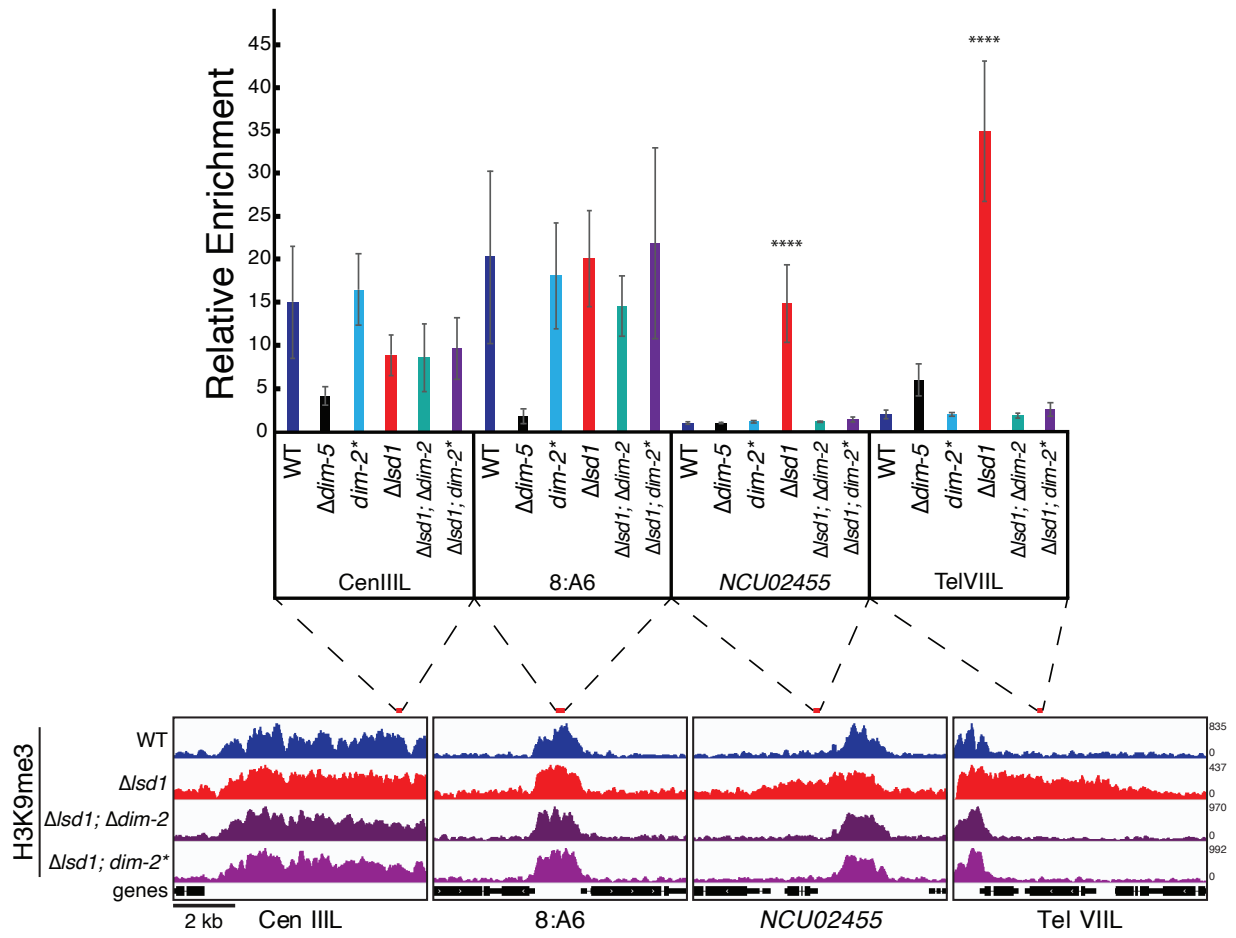

B

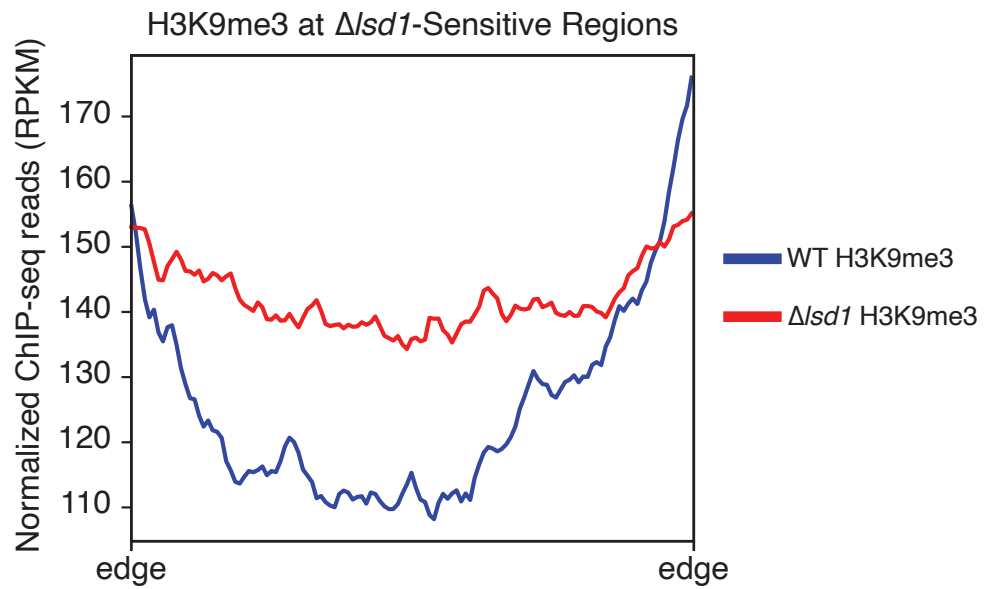

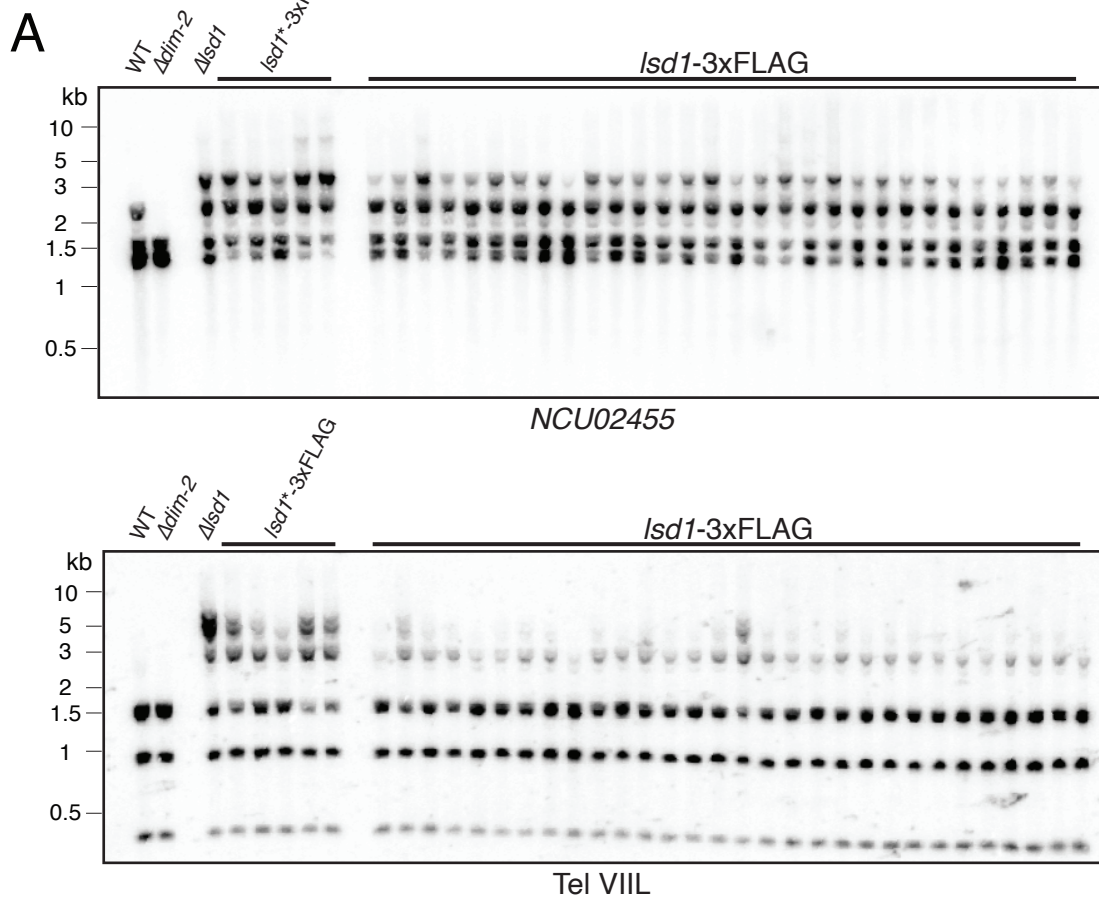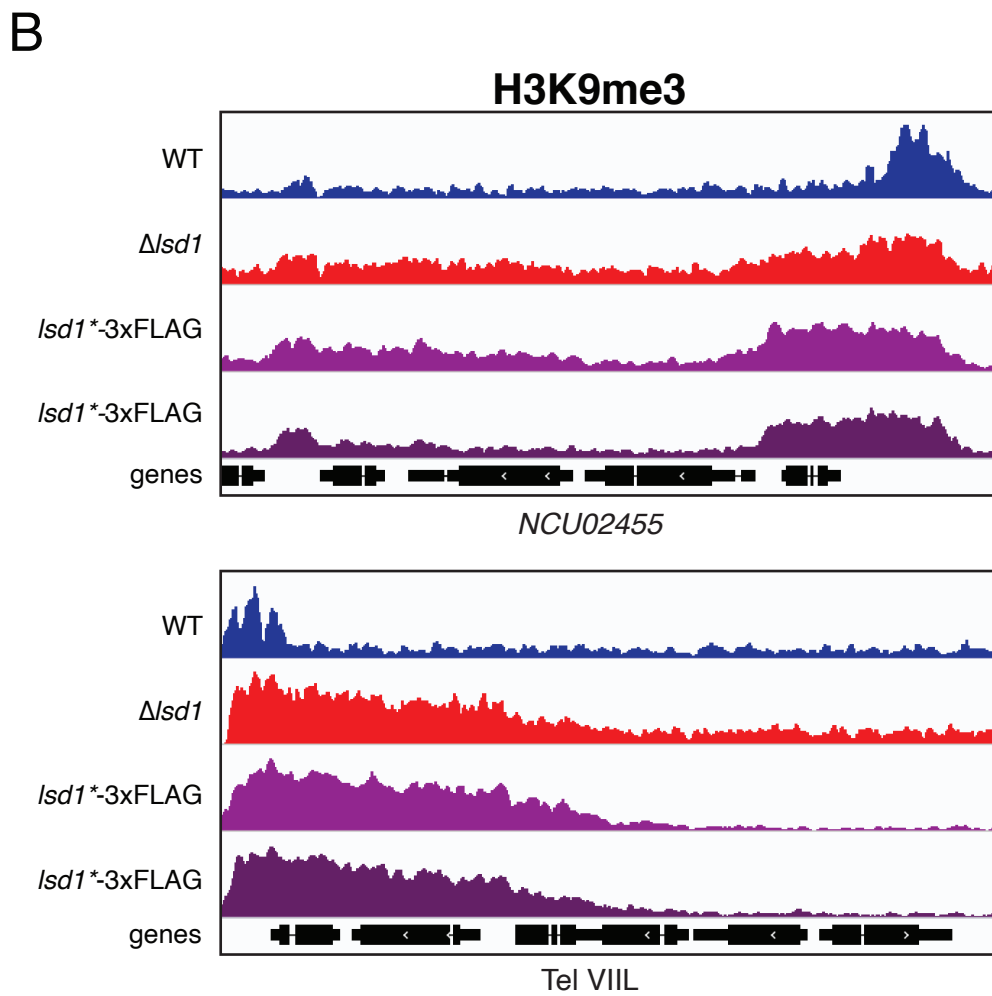

## qRT-PCR

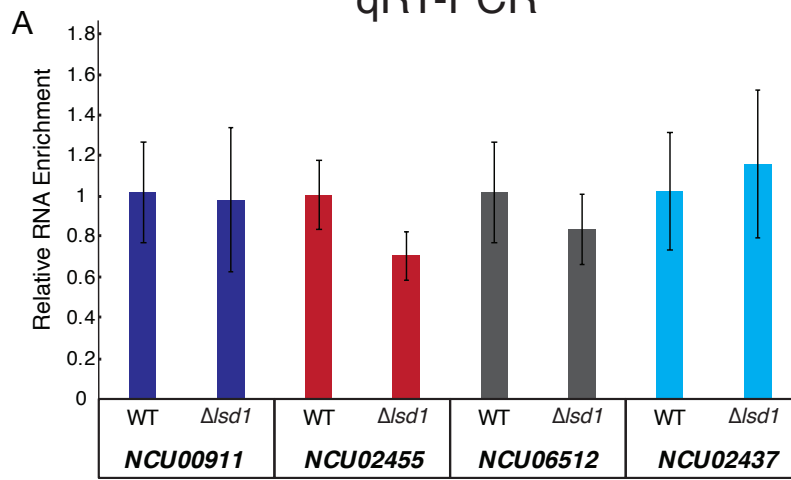**B**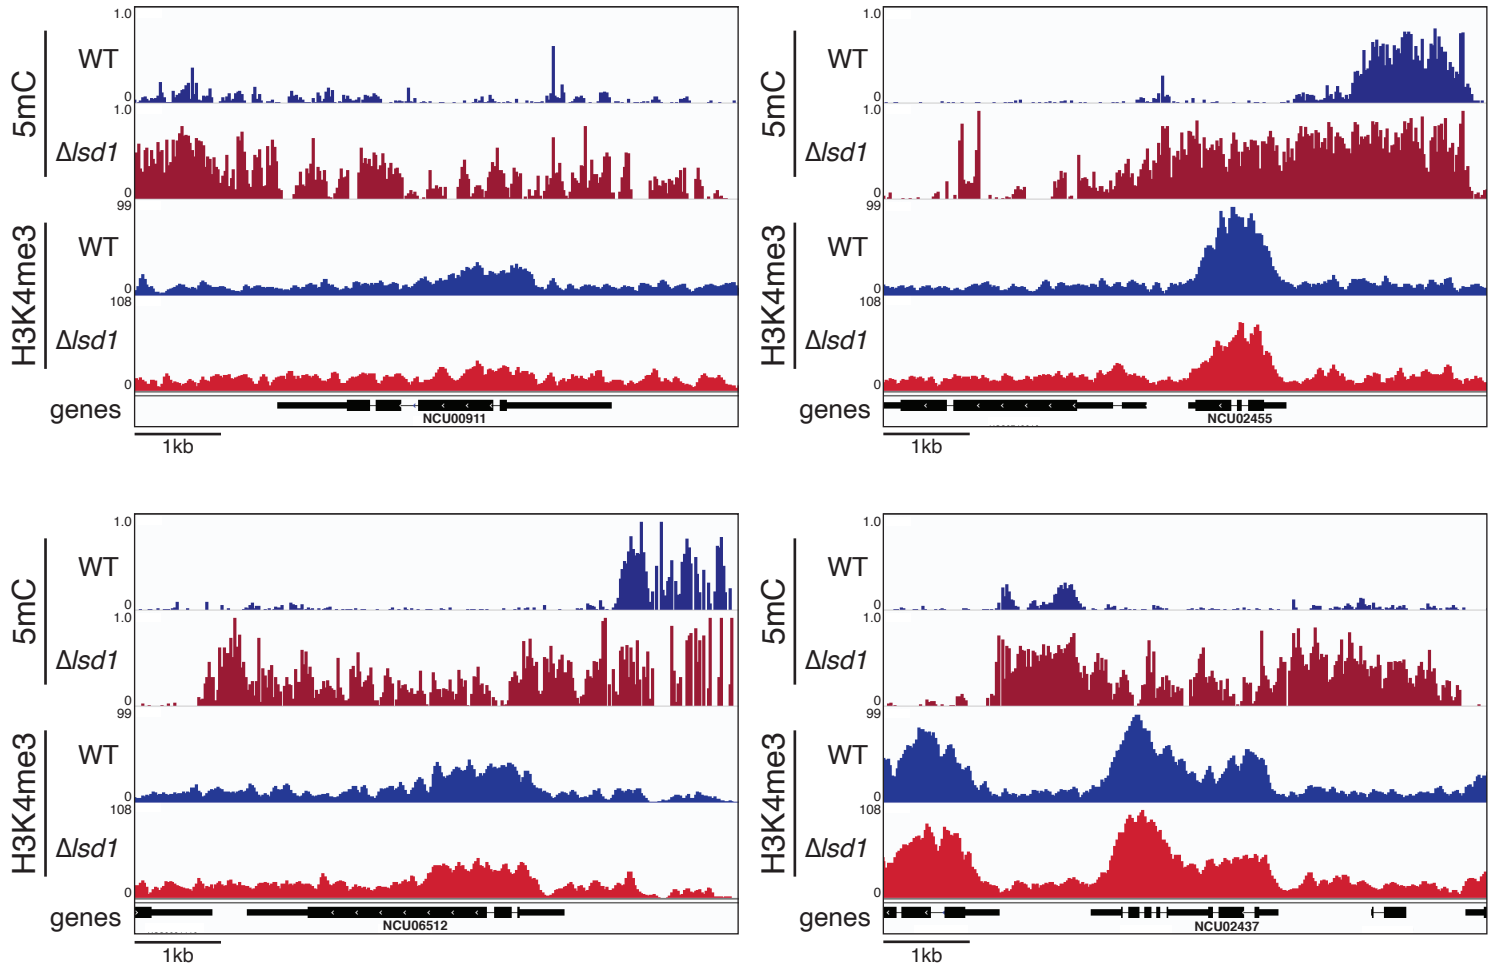



**Table S1. LSD1-associated proteins**

| Gene #          | Predicted Protein                              | MW (kDa)       | # Unique Peptides | Protein Coverage (%) |
|-----------------|------------------------------------------------|----------------|-------------------|----------------------|
| NCU01728        | 6-phosphofructo-2-kinase                       | 90.463         | 412               | 64.3                 |
| NCU09602        | Heat shock 70 kDa protein                      | 70.553         | 37                | 48.3                 |
| <b>NCU09120</b> | <b>Lysine-specific histone demethylase</b>     | <b>150.481</b> | <b>175</b>        | <b>47.4</b>          |
| NCU07830        | 40S ribosomal protein S14                      | 16.019         | 6                 | 47.3                 |
| <b>NCU07297</b> | <b>PHD Finger 1</b>                            | <b>63.895</b>  | <b>76</b>         | <b>46.8</b>          |
| NCU06047        | 40S ribosomal protein S2                       | 28.756         | 18                | 42.6                 |
| NCU08693        | Hsp70-like protein                             | 72.731         | 32                | 40.4                 |
| NCU03757        | 60S ribosomal protein L4-A                     | 38.813         | 17                | 38.8                 |
| NCU02075        | Heat shock protein 70                          | 63.508         | 28                | 38.3                 |
| NCU02707        | 60S ribosomal protein L6                       | 22.475         | 9                 | 37.1                 |
| NCU07829        | 60S ribosomal protein L7                       | 28.687         | 12                | 36.7                 |
| NCU03703        | 60S ribosomal protein L17                      | 20.764         | 5                 | 35.5                 |
| NCU01948        | Ribosomal protein Srp1                         | 18.214         | 4                 | 34.4                 |
| NCU05554        | 60S ribosomal protein L13                      | 23.876         | 9                 | 33.6                 |
| NCU01827        | 60S ribosomal protein L27                      | 15.722         | 3                 | 32.6                 |
| NCU01452        | 40S ribosomal protein S1                       | 29.068         | 8                 | 32.4                 |
| NCU04173        | Actin                                          | 41.607         | 10                | 31.5                 |
| NCU00489        | Cytoplasmic ribosomal protein 10               | 28.666         | 8                 | 30.5                 |
| NCU07014        | 40S ribosomal protein S17                      | 16.942         | 4                 | 29.5                 |
| NCU02295        | Phosphatidylinositol-4-phosphate 5-kinase its3 | 111.877        | 35                | 29.5                 |
| NCU08620        | 40S ribosomal protein S16                      | 15.723         | 3                 | 28.9                 |
| NCU08500        | 40S ribosomal protein S8                       | 23.011         | 5                 | 28.7                 |
| <b>NCU08809</b> | <b>Bromodomain protein-1</b>                   | <b>53.227</b>  | <b>13</b>         | <b>27.3</b>          |
| NCU06226        | 60S ribosomal protein L25                      | 17.119         | 5                 | 26.9                 |
| NCU05275        | Ubiquitin-60S ribosomal protein L40            | 14.637         | 3                 | 26.6                 |
| NCU08045        | Phosphatidylethanolamine N-methyltransferase   | 109.551        | 30                | 26.1                 |
| NCU03102        | 40S ribosomal protein S11                      | 18.428         | 4                 | 26.1                 |
| NCU08389        | 60S ribosomal protein L20                      | 20.343         | 4                 | 25.9                 |
| NCU02003        | Elongation factor 1-alpha                      | 49.672         | 16                | 24.6                 |
| NCU02509        | 60S ribosomal protein L11                      | 20.084         | 5                 | 24.1                 |
| NCU06431        | 40S ribosomal protein S22                      | 14.82          | 2                 | 23.1                 |
| NCU08964        | 60S ribosomal protein L10                      | 25.325         | 7                 | 23.1                 |
| NCU04552        | 40S ribosomal protein S26E                     | 13.546         | 2                 | 22.7                 |

|          |                                                  |         |    |      |
|----------|--------------------------------------------------|---------|----|------|
| NCU03982 | Endoplasmic reticulum chaperone BiP              | 72.331  | 9  | 21.9 |
| NCU03038 | 40S ribosomal protein S13                        | 16.873  | 4  | 21.9 |
| NCU01776 | 60S ribosomal protein L15                        | 24.19   | 10 | 21.7 |
| NCU03302 | 60S ribosomal protein L36                        | 11.555  | 3  | 21.2 |
| NCU01949 | 40S ribosomal protein S9                         | 21.806  | 5  | 21.1 |
| NCU02181 | 40S ribosomal protein S4                         | 29.596  | 5  | 21.1 |
| NCU06843 | 60S ribosomal protein L3                         | 44.035  | 5  | 20.9 |
| NCU02744 | 60S ribosomal protein L9                         | 21.752  | 4  | 20.2 |
| NCU07408 | 60S acidic ribosomal protein P0                  | 33.534  | 5  | 20.1 |
| NCU08269 | Pyridoxamine 5'-phosphate oxidase                | 33.614  | 4  | 18.1 |
| NCU03150 | 60S ribosomal protein L24                        | 17.611  | 3  | 17.9 |
| NCU01221 | 60S ribosomal protein L16                        | 22.901  | 4  | 17.3 |
| NCU00413 | 60S ribosomal protein L2                         | 27.356  | 4  | 17.3 |
| NCU06210 | Uncharacterized protein                          | 15.979  | 3  | 17.3 |
| NCU08334 | Uncharacterized protein                          | 123.589 | 16 | 16.4 |
| NCU08502 | 40S ribosomal protein S6                         | 27.331  | 4  | 15.9 |
| NCU09345 | Thiamine biosynthesis protein NMT-1              | 38.198  | 7  | 15.5 |
| NCU00634 | Ribosomal protein L14                            | 15.853  | 2  | 14.8 |
| NCU06110 | Thiamine thiazole synthase                       | 36.864  | 3  | 14.2 |
| NCU09468 | Tubulin alpha-B chain                            | 49.966  | 8  | 14   |
| NCU00464 | 60S ribosomal protein L32                        | 14.965  | 2  | 13.7 |
| NCU06360 | Histidinol-phosphate aminotransferase            | 43.583  | 3  | 13.7 |
| NCU00294 | 60S ribosomal protein L10a                       | 24.126  | 3  | 12.4 |
| NCU04779 | 60S ribosomal protein L8                         | 23.863  | 2  | 11.4 |
| NCU05599 | 40S ribosomal protein S5                         | 23.68   | 2  | 11.3 |
| NCU04137 | Vacuolar protein sorting-associated protein Vps5 | 64.1    | 6  | 11.2 |
| NCU00475 | 40S ribosomal protein S18                        | 17.768  | 2  | 10.9 |
| NCU01589 | Heat shock protein 60                            | 60.489  | 4  | 10.1 |

**Table S2. PHF1-associated proteins**

| <b>Gene #</b>   | <b>Predicted Protein</b>                       | <b>MW (kDa)</b> | <b># Unique Peptides</b> | <b>Protein Coverage (%)</b> |
|-----------------|------------------------------------------------|-----------------|--------------------------|-----------------------------|
| NCU01728        | 6-phosphofructo-2-kinase                       | 90.463          | 189                      | 61.3                        |
| <b>NCU09120</b> | <b>Lysine-specific histone demethylase</b>     | <b>150.481</b>  | <b>177</b>               | <b>42.1</b>                 |
| <b>NCU07297</b> | <b>PHD Finger 1</b>                            | <b>63.895</b>   | <b>74</b>                | <b>32.1</b>                 |
| NCU08693        | Hsp70-like protein                             | 72.731          | 16                       | 31.6                        |
| NCU07014        | 40S ribosomal protein S17                      | 16.942          | 4                        | 29.5                        |
| NCU09602        | Heat shock 70 kDa protein                      | 70.553          | 17                       | 28.9                        |
| <b>NCU08809</b> | <b>Bromodomain protein-1</b>                   | <b>53.227</b>   | <b>15</b>                | <b>24</b>                   |
| NCU01776        | 60S ribosomal protein L15                      | 24.19           | 5                        | 23.6                        |
| NCU07830        | 40S ribosomal protein S14                      | 16.019          | 5                        | 23.3                        |
| NCU03857        | Isocitrate dehydrogenase [NADP]                | 51.848          | 8                        | 20.6                        |
| NCU04173        | Actin                                          | 41.607          | 5                        | 19.5                        |
| NCU09345        | Thiamine biosynthesis protein NMT-1, variant 2 | 38.198          | 3                        | 19                          |
| NCU08389        | 60S ribosomal protein L20                      | 20.343          | 4                        | 19                          |
| NCU03150        | 60S ribosomal protein L24                      | 17.611          | 3                        | 18.6                        |
| NCU03757        | 60S ribosomal protein L4-A                     | 38.813          | 5                        | 17.7                        |
| NCU03982        | Endoplasmic reticulum chaperone BiP            | 72.331          | 10                       | 17.2                        |
| NCU03038        | 40S ribosomal protein S13                      | 16.873          | 2                        | 17.2                        |
| NCU03806        | 60S ribosomal protein L28                      | 16.597          | 3                        | 15.4                        |
| NCU05275        | Ubiquitin-60S ribosomal protein L40            | 14.637          | 2                        | 14.1                        |
| NCU07829        | 60S ribosomal protein L7                       | 28.687          | 2                        | 14.1                        |
| NCU02075        | Heat shock protein 70                          | 63.508          | 8                        | 14                          |
| NCU02435        | Histone H2B                                    | 14.841          | 2                        | 13.9                        |
| NCU08045        | Phosphatidylethanolamine N-methyltransferase   | 109.551         | 10                       | 13.8                        |
| NCU02003        | Elongation factor 1-alpha                      | 49.672          | 10                       | 10.9                        |

**Table S3. BDP-1-associated proteins**

| <b>Gene #</b>   | <b>Predicted Protein</b>     | <b>MW (kDa)</b> | <b># Unique Peptides</b> | <b>Protein Coverage (%)</b> |
|-----------------|------------------------------|-----------------|--------------------------|-----------------------------|
| <b>NCU08809</b> | <b>Bromodomain protein-1</b> | <b>53.227</b>   | <b>173</b>               | <b>45.4</b>                 |
| NCU01728        | 6-phosphofructo-2-kinase     | 90.463          | 97                       | 41.8                        |
| NCU11181        | Small COPII coat GTPase sar1 | 21.583          | 4                        | 27.5                        |
| NCU01249        | Importin subunit alpha       | 59.696          | 25                       | 25.7                        |
| NCU02003        | Elongation factor 1-alpha    | 49.672          | 18                       | 22.6                        |
| NCU02075        | Heat shock protein 70        | 63.508          | 18                       | 16.2                        |
| NCU09602        | Heat shock 70 kDa protein    | 70.553          | 6                        | 11.9                        |

**Table S4. Lysine methyltransferase KOs screened for loss of H3K9me1 in *Δdim-5* background**

| <b>SET Domain Proteins - (Freitag, 2017)</b>       |          |
|----------------------------------------------------|----------|
| NCU01206                                           | set-1    |
| NCU00269                                           | set-2    |
| NCU01932                                           | ash1     |
| NCU04389                                           | set-4    |
| NCU06119                                           | set-5    |
| NCU09495                                           | set-6    |
| NCU07496                                           | set-7    |
| NCU01973                                           | set-8    |
| NCU08733                                           | set-9    |
| NCU08551                                           | hlm-1    |
| NCU10039                                           | set-11   |
| NCU00970                                           |          |
| NCU02088                                           |          |
| NCU00089                                           |          |
| NCU06658                                           | set-13   |
| NCU09827                                           | rkm-3    |
| NCU09581                                           | set-18   |
| NCU02158                                           | rkm-2    |
| NCU04381                                           | rkm-5    |
| NCU02962                                           | set-14   |
| NCU00870                                           | set-16   |
| NCU08472                                           | set-17   |
|                                                    |          |
| <b>Non-SET Domain KMTs - (Falnes et al., 2016)</b> |          |
| NCU06266                                           | dot-1    |
| NCU07459                                           | PrmA     |
| NCU01669                                           |          |
| NCU07132                                           | PRKMT2   |
| NCU02608                                           | VC PKMT  |
| NCU07181                                           | EEF2 KMT |
| NCU03708                                           | METTL21A |
| NCU04775                                           |          |
| NCU00487                                           | METTL10  |
| NCU02917                                           |          |
| NCU04602                                           | Efm6     |
|                                                    |          |

| <b>WRAD Complex - (Patel et al., 2011)</b> |        |
|--------------------------------------------|--------|
| NCU02104                                   | RbBP5  |
| NCU03037                                   | DPY-30 |

**Table S5. List of genes downregulated in  $\Delta$ *lsd-1* (Methylated genes identified by bisulfite-seq are in yellow)**

| Gene#           | WT FPKM            | $\Delta$ <i>lsd1</i> FPKM | Fold Change (log <sub>2</sub> ) | P Value         | Predicted Protein                       |
|-----------------|--------------------|---------------------------|---------------------------------|-----------------|-----------------------------------------|
| NCU09968        | 1298.609113        | 1.628015575               | -9.639637022                    | 4.29E-118       | Hypothetical protein                    |
| NCU05122        | 623.8966022        | 4.102681214               | -7.248596084                    | 1.67E-32        | Hypothetical protein                    |
| NCU05788        | 754.7072016        | 9.963947109               | -6.243055867                    | 9.73E-32        | Hypothetical protein                    |
| NCU09964        | 169.5522468        | 2.474665639               | -6.098352481                    | 7.17E-24        | Hypothetical protein                    |
| NCU09969        | 87.48231749        | 1.628015575               | -5.747805032                    | 1.07E-12        | Transposase of Sly1-1                   |
| NCU02919        | 114.8728848        | 3.321315703               | -5.112139624                    | 6.04E-11        | cupin domain-containing protein         |
| NCU08842        | 1165.895936        | 39.20294291               | -4.894333255                    | 1.87E-31        | Hypothetical protein                    |
| NCU05852        | 81.2099852         | 4.167965767               | -4.284241792                    | 8.27E-10        | glucuronan lyase-1                      |
| NCU16875        | 807.377254         | 41.67760855               | -4.275898539                    | 1.03E-22        | Hypothetical protein                    |
| NCU00732        | 5847.188501        | 349.8500354               | -4.062934559                    | 1.03E-21        | trichothecene C-15 hydroxylase          |
| NCU02920        | 39.28880678        | 2.409381086               | -4.027383849                    | 9.41E-05        | short-chain dehydrogenase/reductase SDR |
| NCU00607        | 4909.488324        | 311.8834007               | -3.976493996                    | 5.17E-67        | Hypothetical protein                    |
| NCU01958        | 25.17856627        | 1.628015575               | -3.951009728                    | 0.003347461     | mating-type protein A-1                 |
| NCU02061        | 59.5929699         | 4.037396661               | -3.883644909                    | 9.47E-07        | Hypothetical protein                    |
| NCU09278        | 1080.307022        | 81.27225877               | -3.732534581                    | 3.44E-52        | oxidoreductase                          |
| NCU09424        | 307.546009         | 26.11353375               | -3.557932649                    | 7.04E-24        | Hypothetical protein                    |
| NCU07138        | 304.3823196        | 26.24410286               | -3.535819375                    | 1.27E-23        | Hypothetical protein                    |
| NCU02918        | 46.56120666        | 4.102681214               | -3.504489483                    | 6.29E-05        | polyketide synthase 6                   |
| NCU02022        | 101.0061937        | 9.182581598               | -3.45940014                     | 1.05E-09        | Hypothetical protein                    |
| NCU04928        | 1154.74088         | 109.0790927               | -3.404122643                    | 3.12E-47        | Hypothetical protein                    |
| <b>NCU10040</b> | <b>4303.169207</b> | <b>419.1670244</b>        | <b>-3.35980244</b>              | <b>5.90E-28</b> | <b>Hypothetical protein</b>             |
| NCU09698        | 188.8680239        | 18.95067505               | -3.317057323                    | 2.79E-15        | Hypothetical protein                    |
| NCU01957        | 123.8326353        | 12.95884005               | -3.256383085                    | 1.26E-10        | AR2                                     |
| NCU09639        | 83.66553563        | 9.963947109               | -3.069844187                    | 2.68E-07        | Hypothetical protein                    |
| NCU02296        | 784.8286074        | 95.92234983               | -3.032438723                    | 1.06E-17        | Allantoinase                            |
| NCU09357        | 772.8077392        | 94.75337525               | -3.027860302                    | 1.58E-33        | stage V sporulation protein K           |
| NCU09356        | 673.2386795        | 82.8349898                | -3.022805865                    | 3.09E-31        | Hypothetical protein                    |
| NCU07767        | 25.26364323        | 3.25603115                | -2.955876296                    | 0.014934947     | Hypothetical protein                    |
| NCU08037        | 38.19198066        | 4.949331278               | -2.947964225                    | 0.00131088      | Hypothetical protein                    |

|                 |                    |                    |                     |                 |                                         |
|-----------------|--------------------|--------------------|---------------------|-----------------|-----------------------------------------|
| NCU07736        | 964.0395692        | 127.6360113        | -2.917056934        | 2.26E-34        | Pep5 homolog                            |
| <b>NCU05569</b> | <b>388.4156863</b> | <b>54.24474128</b> | <b>-2.840046278</b> | <b>9.84E-21</b> | <b>Hypothetical protein</b>             |
| NCU05980        | 34.92486542        | 4.949331278        | -2.818949041        | 0.003377901     | serine protease-13                      |
| NCU05948        | 181.5864496        | 27.34984201        | -2.731052145        | 1.92E-11        | Hypothetical protein                    |
| NCU08545        | 73.74908254        | 11.20025537        | -2.719093476        | 1.33E-05        | Hypothetical protein                    |
| NCU08535        | 958.0141475        | 146.3908327        | -2.71022175         | 1.02E-09        | acetyl-CoA carboxylase-1                |
| NCU08674        | 1820.530339        | 281.2529381        | -2.694418711        | 2.35E-37        | Pentatricopeptide repeat protein        |
| NCU09441        | 32.0164069         | 4.949331278        | -2.693505892        | 0.007623791     | Hypothetical protein                    |
| NCU07468        | 1446.764531        | 234.823901         | -2.623178972        | 8.60E-34        | NAD-epimerase/dehydratase-1             |
| NCU00866        | 1356.289532        | 222.5790928        | -2.607275199        | 1.12E-32        | DUF1275 domain-containing protein       |
| NCU07547        | 73.31703042        | 12.30804364        | -2.574546889        | 3.06E-05        | phosphoprotein P0-2                     |
| NCU09638        | 43.33078913        | 7.293427812        | -2.570723585        | 0.002132984     | polyketide synthase 5                   |
| NCU09640        | 66.37576398        | 11.39610903        | -2.542115232        | 0.000129153     | MFS toxin efflux pump                   |
| NCU08223        | 193.979309         | 33.86190431        | -2.51816776         | 1.15E-06        | Hypothetical protein                    |
| NCU00721        | 359.909944         | 63.03766468        | -2.513349969        | 1.00E-16        | proline-specific permease               |
| NCU08191        | 73.54223091        | 12.8935555         | -2.511922789        | 4.33E-05        | Hypothetical protein                    |
| NCU06043        | 1115.716534        | 197.5712982        | -2.497525251        | 9.59E-09        | GPR/FUN34 family protein                |
| NCU06341        | 199.5293136        | 35.49196901        | -2.491036195        | 3.81E-11        | MFS transporter                         |
| NCU03887        | 2343.042943        | 421.0746203        | -2.476235569        | 1.29E-34        | carbon catabolite regulation-3          |
| NCU05723        | 1946.064513        | 356.7333137        | -2.447641683        | 9.65E-33        | kinetochore protein-11                  |
| NCU06468        | 302.8417598        | 55.87480598        | -2.438294335        | 2.65E-14        | midasin                                 |
| NCU06666        | 2462.144605        | 455.7076446        | -2.433735018        | 8.60E-34        | inositol-3-phosphate synthase           |
| NCU10610        | 55.73031591        | 10.48417441        | -2.410249073        | 0.000691106     | Hypothetical protein                    |
| NCU06140        | 60.49211881        | 11.52667813        | -2.391770391        | 0.003469222     | Hypothetical protein                    |
| NCU04435        | 317.6668066        | 60.56299904        | -2.391005795        | 2.50E-14        | general amino acid permease AGP3        |
| NCU03257        | 3719.436454        | 719.048313         | -2.370923436        | 2.44E-34        | ammonium transporter MEP1               |
| <b>NCU01400</b> | <b>719.5671643</b> | <b>140.3969485</b> | <b>-2.357617775</b> | <b>1.14E-21</b> | <b>Hypothetical protein</b>             |
| NCU08968        | 29.5700309         | 5.795981342        | -2.351010895        | 0.022199811     | dimethyladenosine transferase           |
| NCU03321        | 158.5623307        | 31.12814959        | -2.34875835         | 2.88E-07        | ribosome biogenesis-59                  |
| NCU04923        | 1065.752249        | 210.3383828        | -2.341088055        | 1.88E-12        | Gld1                                    |
| NCU02802        | 377.1772067        | 74.88871646        | -2.332422226        | 3.36E-15        | mitochondrial ornithine carrier protein |



|          |             |             |              |             |                                              |
|----------|-------------|-------------|--------------|-------------|----------------------------------------------|
| NCU08595 | 131.7280972 | 26.17881831 | -2.33109122  | 1.98E-07    | ribosome biogenesis-49                       |
| NCU04656 | 6063.223324 | 1211.708776 | -2.32304196  | 2.02E-35    | MFS transporter                              |
| NCU10732 | 1056.940942 | 211.9623002 | -2.318015173 | 2.05E-24    | mitochondrial dicarboxylate transporter      |
| NCU07307 | 3385.377427 | 681.9529179 | -2.311572641 | 1.70E-12    | fatty acid synthase beta subunit dehydratase |
| NCU16445 | 1169.802809 | 236.3377405 | -2.307343424 | 3.58E-07    | Hypothetical protein                         |
| NCU08793 | 1489.572378 | 304.8979535 | -2.288499853 | 3.46E-27    | Hypothetical protein                         |
| NCU05277 | 266.4130323 | 55.02815591 | -2.27542277  | 5.81E-12    | Hypothetical protein                         |
| NCU04058 | 316.0136466 | 65.31647666 | -2.274467985 | 2.90E-13    | bZip transcription factor, putative          |
| NCU01209 | 46.7105046  | 9.702808898 | -2.267272667 | 0.003351954 | Hypothetical protein                         |
| NCU04880 | 66.44915938 | 13.80549011 | -2.267008842 | 0.00033323  | Hypothetical protein                         |
| NCU08137 | 5388.870434 | 1122.479999 | -2.263293162 | 2.96E-33    | Hypothetical protein                         |
| NCU02051 | 621.3293056 | 129.9801078 | -2.257067252 | 6.09E-19    | Hypothetical protein                         |
| NCU02850 | 50.63988671 | 10.68002807 | -2.245358739 | 0.002181528 | alcohol dehydrogenase-4                      |
| NCU03396 | 415.5301668 | 87.65375197 | -2.245065467 | 2.78E-15    | nucleolar protein nop-58                     |
| NCU07607 | 551.3903376 | 116.7601295 | -2.23952627  | 1.70E-16    | sugar transporter-16                         |
| NCU00821 | 194.8550948 | 41.35118578 | -2.236401048 | 3.14E-09    | sugar transporter-15                         |
| NCU03154 | 1124.758    | 238.922484  | -2.235000098 | 1.45E-23    | Pantothenate kinase                          |
| NCU04307 | 221.6109186 | 47.08188257 | -2.234785051 | 4.25E-10    | phenylalanine-7                              |
| NCU02369 | 12094.58684 | 2581.25601  | -2.228216346 | 2.30E-06    | Polygalacturonase                            |
| NCU00337 | 38.41051385 | 8.205362428 | -2.226862301 | 0.010800571 | nuclear export protein Noc3                  |
| NCU03646 | 3893.578696 | 839.8215372 | -2.212942095 | 3.19E-23    | Hypothetical protein                         |
| NCU08287 | 1465.328005 | 316.6266327 | -2.210369123 | 8.65E-13    | pyrABCN                                      |
| NCU10895 | 403.1256258 | 87.39261376 | -2.205646239 | 1.12E-14    | mutS ortholog 4 protein                      |
| NCU09990 | 33.53611071 | 7.293427812 | -2.201046459 | 0.019902591 | Hypothetical protein                         |
| NCU07308 | 2147.106919 | 467.1792838 | -2.200345827 | 5.02E-11    | fatty acid synthase alpha subunit reductase  |
| NCU07034 | 298.4177576 | 65.31852579 | -2.191769252 | 8.65E-12    | Hypothetical protein                         |
| NCU01595 | 37.35289257 | 8.205362428 | -2.186581005 | 0.014009037 | rRNA maturation-11                           |
| NCU04205 | 1214.158682 | 267.3944581 | -2.182915514 | 9.67E-10    | aspartyl protease-17                         |
| NCU01066 | 43.8112205  | 9.702808898 | -2.174826043 | 0.0064656   | L-amino acid oxidase                         |
| NCU05045 | 59.06415926 | 13.08940915 | -2.173882977 | 0.001144557 | MFS monocarboxylate transporter              |
| NCU04931 | 2107.870596 | 468.8664365 | -2.168537388 | 7.65E-27    | Hypothetical protein                         |
| NCU07656 | 36.51129735 | 8.140077876 | -2.165228431 | 0.015486455 | Hypothetical protein                         |
| NCU08397 | 1219.390089 | 272.1397393 | -2.163740178 | 2.87E-23    | Hypothetical protein                         |

|          |             |             |              |             |                                      |
|----------|-------------|-------------|--------------|-------------|--------------------------------------|
| NCU03963 | 141.1065653 | 31.84423054 | -2.147681196 | 5.30E-07    | 5'-methylthioadenosine phosphorylase |
| NCU05089 | 256.2321739 | 58.0883334  | -2.141131296 | 1.27E-10    | MFS monocarboxylate transporter      |
| NCU08358 | 521.3123521 | 118.3269588 | -2.139369239 | 3.03E-07    | Hypothetical protein                 |
| NCU06720 | 469.3179012 | 106.8655652 | -2.134768435 | 2.59E-13    | serine protease-11                   |
| NCU10009 | 703.2591114 | 161.432631  | -2.123124113 | 4.52E-18    | ATP-binding cassette transporter     |
| NCU09267 | 2023.443583 | 466.3408302 | -2.11735597  | 2.51E-12    | copper radical oxidase               |
| NCU06409 | 50.49976319 | 11.65724724 | -2.115049474 | 0.018446542 | ribosome biogenesis-51               |
| NCU01070 | 187.5434901 | 43.49942866 | -2.108156829 | 3.04E-08    | Hypothetical protein                 |
| NCU12050 | 71.86154759 | 16.7350985  | -2.102342963 | 0.000574717 | Hypothetical protein                 |
| NCU02188 | 97.04928829 | 22.7269335  | -2.094314596 | 4.50E-05    | arabinose-proton symporter           |
| NCU01195 | 3242.903706 | 762.0927989 | -2.089247597 | 7.63E-27    | Glu/Leu/Phe/Val dehydrogenase        |
| NCU08976 | 2072.168412 | 490.1082183 | -2.079969017 | 2.69E-12    | fatty acid metabolism-1              |
| NCU09045 | 279.1828973 | 66.03255762 | -2.079961133 | 1.13E-10    | heterokaryon incompatibility-16      |
| NCU04583 | 148.8986014 | 35.2308308  | -2.079419801 | 5.50E-07    | acetyltransferase                    |
| NCU05235 | 143.932454  | 34.12304252 | -2.076573735 | 1.11E-06    | ribosome biogenesis protein RLP24    |
| NCU07449 | 37.80580067 | 9.052012493 | -2.062297128 | 0.017756085 | Hypothetical protein                 |
| NCU05153 | 395.3702874 | 95.01451346 | -2.056984648 | 4.40E-08    | carbohydrate O-acetyltransferase     |
| NCU00777 | 64.37312166 | 15.49879024 | -2.054302821 | 0.001321596 | Methyltransferase                    |
| NCU02653 | 40.55327969 | 9.833378004 | -2.044059588 | 0.013287485 | allantoate permease                  |
| NCU05629 | 54.86119741 | 13.35054737 | -2.038887218 | 0.002660797 | Hypothetical protein                 |
| NCU02729 | 86.84090661 | 21.29477158 | -2.027875533 | 0.00017198  | transducin family protein            |
| NCU09465 | 59.03663598 | 14.58685562 | -2.01694159  | 0.002660797 | diphthamide biosynthesis protein 3   |
| NCU09841 | 154.6512974 | 38.35629284 | -2.011483742 | 8.75E-07    | phosphotyrosine protein phosphatase  |
| NCU01083 | 135.9585824 | 33.79866888 | -2.00812889  | 2.52E-06    | S-adenosylmethionine decarboxylase   |
| NCU01611 | 977.4291351 | 243.0884006 | -2.007511055 | 1.36E-18    | carnitine-1                          |

**Table S6. List of genes upregulated in *Δlsd-1***

| <b>Gene#</b> | <b>WT FPKM</b> | <b><i>Δlsd1</i> FPKM</b> | <b>Fold Change (log2)</b> | <b>P Value</b> | <b>Predicted Protein</b>                   |
|--------------|----------------|--------------------------|---------------------------|----------------|--------------------------------------------|
| NCU08570     | 2.020991173    | 26.89489927              | 3.73419766                | 0.000472711    | Hypothetical protein                       |
| NCU07822     | 15.45061596    | 190.932765               | 3.627328438               | 9.84E-21       | Hypothetical protein                       |
| NCU09685     | 8.603600908    | 86.34806091              | 3.32715127                | 1.92E-07       | Hypothetical protein                       |
| NCU08271     | 56.29582425    | 458.4454975              | 3.025650409               | 2.01E-27       | guanine triphosphate binding-15            |
| NCU04697     | 9.585319651    | 72.6731399               | 2.922523792               | 1.95E-06       | cyanide hydratase                          |
| NCU04407     | 54.69104348    | 338.0437769              | 2.627833595               | 3.96E-12       | RNA methyltransferase-5                    |
| NCU07497     | 104.7078682    | 608.5493532              | 2.539004414               | 7.52E-24       | Hypothetical protein                       |
| NCU07938     | 117.2199952    | 678.3786605              | 2.532872105               | 0.022071512    | MFS transporter                            |
| NCU04823     | 528.4854863    | 2818.412899              | 2.414947226               | 0.000877967    | alcohol dehydrogenase-12                   |
| NCU07111     | 166.2067219    | 840.9556766              | 2.339051034               | 3.01E-13       | metallo-beta-lactamase-2                   |
| NCU00578     | 29.22054861    | 138.8995021              | 2.248986257               | 6.17E-06       | peptidyl-prolyl cis-trans isomerase-like 1 |
| NCU04237     | 565.7933057    | 2599.938824              | 2.200130665               | 5.93E-27       | phosphopantothenoylcysteine decarboxylase  |
| NCU03109     | 14.6574        | 65.57761488              | 2.161574216               | 0.002772376    | Hypothetical protein                       |
| NCU06513     | 81.33175987    | 362.5925305              | 2.156458469               | 1.30E-13       | Hypothetical protein                       |
| NCU06974     | 508.5207769    | 2236.773077              | 2.137040275               | 2.74E-17       | histidinol-phosphatase                     |
| NCU01058     | 12.99506554    | 56.32974872              | 2.115933126               | 0.000997833    | Hypothetical protein                       |
| NCU07995     | 8.074790268    | 33.79661976              | 2.065382266               | 0.014600114    | Hypothetical protein                       |

**Table S7. Strains used in this study**

| Strains | Genotype                                                                         | Source                      |
|---------|----------------------------------------------------------------------------------|-----------------------------|
| N150    | <i>mat A</i>                                                                     | FGSC#2489                   |
| N624    | <i>mat A his-3-</i>                                                              | This Study                  |
| N625    | <i>mat a his-3-</i>                                                              | FGSC#6524                   |
| N1909   | <i>mat a his-3::P<sub>qa</sub>::dim-2<sup>C926A</sup>; Δdim-2::hph</i>           | Kouzminova and Selker, 2001 |
| N2930   | <i>mat A his-3; Δmus-52::bar<sup>+</sup></i>                                     | Honda et al., 2008          |
| N3435   | <i>mat A his-3; Δhda-1::hph</i>                                                  | Honda et al., 2016          |
| N3752   | <i>mat A</i>                                                                     | FGSC#2489                   |
| N3753   | <i>mat a</i>                                                                     | FGSC#4200                   |
| N3944   | <i>mat A; Δdim-5::bar</i>                                                        | Lewis et al., 2010          |
| N3998   | <i>mat A his-3::P<sub>hda-1</sub>::hda-1<sup>D263N</sup>-3xFLAG; Δhda-1::hph</i> | Honda et al., 2016          |
| N4711   | <i>mat A his-3; Δdim-2::hph</i>                                                  | This Study                  |
| N5555   | <i>mat a Δlsd1::hph</i>                                                          | FGSC#11964                  |
| N5637   | <i>mat A his-3; dim-5-Dam::hph</i>                                               | This Study                  |
| N6220   | <i>mat A; Δbdp-1::hph</i>                                                        | FGSC# 11957                 |
| N6221   | <i>mat a; Δphf1::hph</i>                                                         | FGSC# 14344                 |
| N6271   | <i>mat ? Δlsd1::hph; Δbdp-1::hph</i>                                             | This Study                  |
| N6272   | <i>mat ? Δlsd1::hph; Δphf1::hph</i>                                              | This Study                  |
| N6300   | <i>mat A his-3- lsd1-3xFLAG::hph</i>                                             | This Study                  |
| N6301   | <i>mat A his-3- lsd1-HA::hph</i>                                                 | This Study                  |
| N6307   | <i>mat A his-3- lsd1-3xFLAG::hph</i>                                             | This Study                  |
| N6308   | <i>mat a his-3; phf1-3xFLAG::hph</i>                                             | This Study                  |
| N6309   | <i>mat A his-3; phf1-3xFLAG::hph</i>                                             | This Study                  |
| N6310   | <i>mat a his-3; bdp-1-3xFLAG::hph</i>                                            | This Study                  |
| N6313   | <i>mat A his-3; phf1-3xFLAG::hph</i>                                             | This Study                  |
| N6314   | <i>mat a his-3; phf1-3xFLAG::hph</i>                                             | This Study                  |
| N6337   | <i>mat a Δlsd1::hph; Δdim-2::hph</i>                                             | This Study                  |
| N6395   | <i>mat A his-3; lsd1-HA::hph; phf1-3xFLAG::hph</i>                               | This Study                  |
| N6396   | <i>mat A his-3- lsd1-HA::hph; bdp-1-3xFLAG::hph</i>                              | This Study                  |
| N6411   | <i>mat A his-3- Δlsd1::nat-1</i>                                                 | This Study                  |
| N6412   | <i>mat a his-3- Δlsd1::nat-1</i>                                                 | This Study                  |
| N6414   | <i>mat a his-3; Δphf1::nat-1</i>                                                 | This Study                  |
| N6416   | <i>mat a his-3; Δbdp-1::nat-1</i>                                                | This Study                  |
| N6679   | <i>mat a his-3::dim-2<sup>C926A</sup> Δlsd1::nat-1; Δdim-2::hph</i>              | This Study                  |
| N7899   | <i>his-3- lsd1<sup>NK972,973AA</sup>-3xFLAG::nat-1</i>                           | This Study                  |
| N7943   | <i>his-3- lsd1<sup>NK972,973AA</sup>-3xFLAG::nat-1</i>                           | This Study                  |
| N7944   | <i>his-3- lsd1<sup>NK972,973AA</sup>-3xFLAG::nat-1</i>                           | This Study                  |
| N7945   | <i>his-3- lsd1<sup>NK972,973AA</sup>-3xFLAG::nat-1</i>                           | This Study                  |

|       |                                                                       |            |
|-------|-----------------------------------------------------------------------|------------|
| N7946 | <i>his-3- lsd1<sup>NK972,973AA</sup>-3xFLAG::nat-1</i>                | This Study |
| N7977 | <i>mat a Δlsd1::hph</i>                                               | This Study |
| N7978 | <i>mat a Δlsd1::hph</i>                                               | This Study |
| N7979 | <i>mat ? Δlsd1::hph</i>                                               | This Study |
| N7980 | <i>mat a Δlsd1::hph</i>                                               | This Study |
| N7981 | <i>mat a Δlsd1::hph</i>                                               | This Study |
| N7982 | <i>mat a Δlsd1::hph</i>                                               | This Study |
| N7983 | <i>mat ? Δlsd1::hph</i>                                               | This Study |
| N7984 | <i>mat a Δlsd1::hph</i>                                               | This Study |
| N7985 | <i>mat a Δlsd1::hph</i>                                               | This Study |
| N8040 | <i>his-3-? lsd1-3xFLAG::hph</i>                                       | This Study |
| N8041 | <i>his-3-? lsd1-3xFLAG::hph</i>                                       | This Study |
| N8042 | <i>his-3-? lsd1-3xFLAG::hph</i>                                       | This Study |
| N8043 | <i>his-3-? lsd1-3xFLAG::hph</i>                                       | This Study |
| N8044 | <i>his-3-? lsd1-3xFLAG::hph</i>                                       | This Study |
| N8045 | <i>his-3-? lsd1-3xFLAG::hph</i>                                       | This Study |
| N8046 | <i>his-3-? lsd1-3xFLAG::hph</i>                                       | This Study |
| N8047 | <i>his-3-? lsd1-3xFLAG::hph</i>                                       | This Study |
| N8048 | <i>his-3-? lsd1-3xFLAG::hph</i>                                       | This Study |
| N8049 | <i>his-3-? lsd1-3xFLAG::hph</i>                                       | This Study |
| N8050 | <i>his-3-? lsd1-3xFLAG::hph</i>                                       | This Study |
| N8051 | <i>his-3-? lsd1-3xFLAG::hph</i>                                       | This Study |
| N8052 | <i>his-3-? lsd1-3xFLAG::hph</i>                                       | This Study |
| N8053 | <i>his-3-? lsd1-3xFLAG::hph</i>                                       | This Study |
| N8054 | <i>his-3-? lsd1-3xFLAG::hph</i>                                       | This Study |
| N8055 | <i>his-3-? lsd1-3xFLAG::hph</i>                                       | This Study |
| N8056 | <i>his-3-? lsd1-3xFLAG::hph</i>                                       | This Study |
| N8057 | <i>his-3-? lsd1-3xFLAG::hph</i>                                       | This Study |
| N8058 | <i>his-3-? lsd1-3xFLAG::hph</i>                                       | This Study |
| N8059 | <i>his-3-? lsd1-3xFLAG::hph</i>                                       | This Study |
| N8060 | <i>his-3-? lsd1-3xFLAG::hph</i>                                       | This Study |
| N8061 | <i>his-3-? lsd1-3xFLAG::hph</i>                                       | This Study |
| N8062 | <i>his-3-? lsd1-3xFLAG::hph</i>                                       | This Study |
| N8063 | <i>his-3-? lsd1-3xFLAG::hph</i>                                       | This Study |
| N8064 | <i>his-3-? lsd1-3xFLAG::hph</i>                                       | This Study |
| N8065 | <i>his-3-? lsd1-3xFLAG::hph</i>                                       | This Study |
| N8066 | <i>his-3-? lsd1-3xFLAG::hph</i>                                       | This Study |
| N8067 | <i>his-3-? lsd1-3xFLAG::hph</i>                                       | This Study |
| N8068 | <i>his-3-? lsd1-3xFLAG::hph</i>                                       | This Study |
| N8081 | <i>Δlsd1::hph; Δdim-2::hph</i>                                        | This Study |
| N8082 | <i>Δlsd1::hph; Δdim-2::hph</i>                                        | This Study |
| N8083 | <i>his-3::dim-2<sup>C926A</sup> Δlsd1::nat-1; Δdim-2::hph</i>         | This Study |
| N8084 | <i>his-3::dim-2<sup>C926A</sup> Δlsd1::nat-1; Δdim-2::hph</i>         | This Study |
| N8089 | <i>his-3::Phda-1::hda-1D263N-3xFLAG<br/>Δlsd1::nat-1; Δhda-1::hph</i> | This Study |

|       |                                                                             |            |
|-------|-----------------------------------------------------------------------------|------------|
| N8090 | <i>his-3::Phda-1::hda-1D263N-3xFLAG</i><br><i>Δlsd1::nat-1; Δhda-1::hph</i> | This Study |
| N8105 | <i>mat ? Δlsd1::hph; Δbdp-1::hph</i>                                        | This Study |
| N8106 | <i>mat ? Δlsd1::hph; Δbdp-1::hph</i>                                        | This Study |
| N8107 | <i>mat ? Δlsd1::hph; Δbdp-1::hph</i>                                        | This Study |
| N8108 | <i>mat ? Δlsd1::hph; Δbdp-1::hph</i>                                        | This Study |
| N8109 | <i>mat ? Δlsd1::hph; Δphf1::hph</i>                                         | This Study |
| N8110 | <i>mat ? Δlsd1::hph; Δphf1::hph</i>                                         | This Study |
| N8111 | <i>mat ? Δlsd1::hph; Δphf1::hph</i>                                         | This Study |
| N8112 | <i>mat ? Δlsd1::hph; Δphf1::hph</i>                                         | This Study |

**Table S8. Primers used in this study**

| <b>Primer</b>                                 | <b>Sequence</b>                                     |
|-----------------------------------------------|-----------------------------------------------------|
| <b>For 3xFLAG-tagging LSD1</b>                |                                                     |
| <i>LSD1</i> KI FP1                            | 5'-TAGCTCTTATGGCTGGCGAC-3'                          |
| <i>LSD1</i> KI RP2                            | 5'-CCGCCTCCGCCTCCGCCGCCTCCGCCCCAGTCATCGCAACATCA-3'  |
| <i>LSD1</i> KI FP3                            | 5'-TATACGAAGTTATGGATCCGAGCTCGAGGTTAAGACGTTATCAAG-3' |
| <i>LSD1</i> KI RP4                            | 5'-TTGTTTGGGGCGCTTGATGG-3'                          |
| <b>For 3xFLAG-tagging PHF1</b>                |                                                     |
| <i>NCU07297(Phf1)</i> KI FP1                  | 5'-GTCACAGACGGAAACGCATC-3'                          |
| <i>NCU07297(Phf1)</i> KI RP2                  | 5'-TCCGCCTCCGCCTCCGCCGCCTCCGCCTACCCTCAAGCCATTCTC-3' |
| <i>NCU07297(Phf1)</i> KI FP3                  | 5'-CTATACGAAGTTATGGATCCGAGCTCGGAAGACTTTGAGCGTGTC-3' |
| <i>NCU07297(Phf1)</i> KI RP4                  | 5'-ACCTAGTACTGGCATTATC-3'                           |
| <b>For 3xFLAG-tagging BDP-1</b>               |                                                     |
| <i>Bdf1(NCU08809)</i> KI FP1                  | 5'-CGACTACGAGGTTCTCATCG-3'                          |
| <i>Bdf1(NCU08809)</i> KI RP2                  | 5'-TCCGCCTCCGCCTCCGCCGCCTCCGCCGTTAGATCCCTCTTGCC-3'  |
| <i>Bdf1(NCU08809)</i> KI FP3                  | 5'-CTATACGAAGTTATGGATCCGAGCTCGCGCTCTGTCCAAATGGAC-3' |
| <i>Bdf1(NCU08809)</i> KI RP4                  | 5'-GTTGCAGTGCTATTCCATCG-3'                          |
| <b>For <math>\Delta</math>lsd1::nat-1 KO</b>  |                                                     |
| 6696                                          | 5'-TGGGGCAACGGGAACGAAGA-3'                          |
| 6697                                          | 5'-GCTCCAGCCAAGCCCCAAAAACGTGAGGCGCAGAGAGAGG-3'      |
| 6698                                          | 5'-TGAGCATGCCCTGCCCTGAGCATAGATGCAAACGTCGCC-3'       |
| 6699                                          | 5'-CAAAGAACGCCGCGAGATG-3'                           |
| <b>For <math>\Delta</math>phf1::nat-1 KO</b>  |                                                     |
| 5284                                          | 5'-GGCCGCGATCGAGAATGGGA-3'                          |
| 6694                                          | 5'-GCTCCAGCCAAGCCCCAAAAAGCGACAGCATTGACCACGTG-3'     |
| 6695                                          | 5'-TGAGCATGCCCTGCCCTGAGGCTCCCTCCTCTCTCC-3'          |
| 5285                                          | 5'-CTGGGCTCTCTGCGAGGGTC-3'                          |
| <b>For <math>\Delta</math>bdp-1::nat-1 KO</b> |                                                     |
| 6700                                          | 5'-CGGAGTTGTGCGGTGATGGC-3'                          |
| 6701                                          | 5'-GCTCCAGCCAAGCCCCAAAAAAGCTCCCGCAGAACCAAGC-3'      |
| 6702                                          | 5'-TGAGCATGCCCTGCCCTGACGTGCGATGCTAAGCCTCCA-3'       |
| 5289                                          | 5'-CGCCGTCCAGCAAACGTTCA-3'                          |
| 4883                                          | 5'-AACCCATCCGCCGGTACGCG-3'                          |

|                                       |                                                              |
|---------------------------------------|--------------------------------------------------------------|
| 4884                                  | 5'-TCCTTCACCACCGACACCGTCTTCC-3'                              |
| <b>For catalytic-null LSD1-3xFLAG</b> |                                                              |
| 6716                                  | 5'-GCCACGCCCAAGTAACAACG-3'                                   |
| 6717                                  | 5'-TGACGGCCGCGAGAACACCAAAGCCTATACGTTCCG-3'                   |
| 6718                                  | 5'-TCTCGCGCCGTCATCCTCGTGTAACAAGGAGGCAT-3'                    |
| 6720                                  | 5'-CCTCCGCCTCCGCCTCCGCCGCCTCCGCCCCAGTCATCGCAACATCAA-3'       |
| 6721                                  | 5'-GAGCTCGGTACCAAGCTTGATGCATAGCGGTTAAGACGTTATCAAGTAAGTGAG-3' |
| 6722                                  | 5'-AAATAAAAGCCGCAGACGGG-3'                                   |
| <b>Southern Hybridization Probes</b>  |                                                              |
| <b>Tel VIII (2391bp)</b>              |                                                              |
| 5272                                  | 5'-GGCATCCGTGGGTGTCCCAG-3'                                   |
| 5273                                  | 5'-TTCCCGTCCCTACCAGGCAT-3'                                   |
| <b>NCU02455 (910bp)</b>               |                                                              |
| 5440                                  | 5'-GCTGCCAGGTGTCCAACACTAC-3'                                 |
| 5442                                  | 5'-CAGCTCATTGTGCTCCTGGA-3'                                   |
| <b>NCU10040 (1071bp)</b>              |                                                              |
| 5446                                  | 5'-TCCGCCTTCAACTCTTCCGC-3'                                   |
| 5448                                  | 5'-GCCAGCGTGTGACGGTCATC-3'                                   |
| <b>NCU04942 (1056bp)</b>              |                                                              |
| 5449                                  | 5'-CCTGTGGCGGTTAGCGACAA-3'                                   |
| 5451                                  | 5'-TGACACCAGCGCTGTCACCG-3'                                   |
| <b>NCU05569 (1172bp)</b>              |                                                              |
| 6692                                  | 5'-ACCAGTGTGTCCTCAACCCAG-3'                                  |
| 6693                                  | 5'-GGTGGTCTTGGTCGAGGCCT-3'                                   |
| <b>his-3 (2631bp)</b>                 |                                                              |
| 1665                                  | 5'-GACGGGGTAGCTTGGCCCTAATTAACC-3'                            |
| 3128                                  | 5'-CGATTTAGGTGACACTATAG-3'                                   |
| <b>8:A6 (605bp)</b>                   |                                                              |
| 1877                                  | 5'-TGGTTGGTCGATTGTGGTGG-3'                                   |
| 1878                                  | 5'-TTTTGAGGATCCGCCATCCG-3'                                   |
| <b>actin (717bp)</b>                  |                                                              |
| 3211                                  | 5'-CACGGTGTGCTTACCAACTG-3'                                   |
| 3212                                  | 5'-GTCGGAGAGACCAGGGTACA-3'                                   |
| <b>pan-1 (1007bp)</b>                 |                                                              |
| 3181                                  | 5'-CGATAAGCTTGATATCGAATTCAGGTTGTCCGGCCATCTCAGTCTGATCC-3'     |
| 3182                                  | 5'-TCGCATACGCCAACCCATGC-3'                                   |
| <b>qPCR</b>                           |                                                              |
| <b>ChIP-qPCR</b>                      |                                                              |



|                                       |                                      |
|---------------------------------------|--------------------------------------|
| <b>hH4 (102bp)</b>                    |                                      |
| 4082                                  | 5'-CATCAAGGGGTCATTCAC-3'             |
| 4083                                  | 5'-TTTGAATCACCTCCAG-3'               |
|                                       |                                      |
| <b>Cen III L (169bp)</b>              |                                      |
| 5250                                  | 5'-CGACTATCCGAACCGGAAGGAG-3'         |
| 5251                                  | 5'-CCGAATCCGGCTCAGTACAGC-3'          |
|                                       |                                      |
| <b>8:A6 (302bp)</b>                   |                                      |
| 1823                                  | 5'-GGATGGCGGATCCTCAAAAATA-3'         |
| 1824                                  | 5'-TAACCGCCGCTTTTTAAATTAGGA-3'       |
|                                       |                                      |
| <b>NCU02455 (158bp)</b>               |                                      |
| 5440                                  | 5'-GCTGCCAGGTGTCCAACACTAC-3'         |
| 5441                                  | 5'-GAGGCTAGTAGCGACAGCGA-3'           |
|                                       |                                      |
| <b>Tel VIII (208bp)</b>               |                                      |
| 5272                                  | 5'-TTCCCGTCCCTACCAGGCAT-3'           |
| 5273                                  | 5'-GAGCGGAGGTGGACTTTGCG-3'           |
|                                       |                                      |
| <b>RT-qPCR</b>                        |                                      |
| <b>NCU02840 (104bp)</b>               |                                      |
| 6271                                  | 5'-CCCTCTCAGACGAGGATATTCA-3'         |
| 6272                                  | 5'-GCTCTGCTGCTTCTCCTTTAT-3'          |
|                                       |                                      |
| <b>NCU00911 (207bp)</b>               |                                      |
| 6636                                  | 5'-GACAACAAAGGCCAAGGACG-3'           |
| 6637                                  | 5'-ACCTGGATCCAGTATGAGCC-3'           |
|                                       |                                      |
| <b>NCU02455 (228bp)</b>               |                                      |
| 6638                                  | 5'-TTGATAACCTGACCACCGCC-3'           |
| 6639                                  | 5'-TTTCCTGTCGCTGTCGCTAC-3'           |
|                                       |                                      |
| <b>NCU06512 (219bp)</b>               |                                      |
| 6640                                  | 5'-GAGGGGATGATGTGCGACACC-3'          |
| 6641                                  | 5'-CCCCCTAATCTCCGTTTGT-3'            |
|                                       |                                      |
| <b>NCU02437 (196bp)</b>               |                                      |
| 6642                                  | 5'-AGGAGACGATGGACACGACC-3'           |
| 6643                                  | 5'-TACGTCAACCGAAACGACGC-3'           |
|                                       |                                      |
| <b>Yeast two-hybrid</b>               |                                      |
| <b>PHF1 constructs</b>                |                                      |
| 418 MfeI-<br>Phf1(NCU07297) 2aa<br>FP | 5'-ATCCAATTGGCAGACCAGACACCAAACGT-3'  |
| 419 Phf1(NCU07297)<br>605aa BamHI RP  | 5'-CGGGATCCTATACCCTCAAGCCATTCT-3'    |
| 513 Phf1(NCU07297)<br>353aa BamHI RP  | 5'-CGGGATCCTAGGCTTGCTCGGCTGTGCGCT-3' |

|                                                          |                                       |
|----------------------------------------------------------|---------------------------------------|
| 610 <i>MfeI</i> -<br><i>Phf1</i> (NCU07297)<br>117aa FP  | 5'-ATCCAATTGCCCTGGTCCAGCCGAGCAT-3'    |
| 611 <i>Phf1</i> (NCU07297)<br>275aa <i>Bam</i> HI RP     | 5'-CGGGATCCTATTTCGTCCGCGTCTTGTTGTT-3' |
| 612 <i>Eco</i> RI-<br><i>Phf1</i> (NCU07297)<br>312aa FP | 5'-CGAATTCACCAAATCCGGCCGTC AAGT-3'    |
| 695 <i>Eco</i> RI-<br><i>Phf1</i> (NCU07297)<br>401aa FP | 5'-CGAATTCGTATGTTTCGCTGTGTGTGGC-3'    |
| 696 <i>Phf1</i> (NCU07932)<br>540aa <i>Bam</i> HI RP     | 5'-CGGGATCCTAGCCTTGGTTCTCTTGGCTCG-3'  |
| 710 <i>Phf1</i> 140aa<br><i>Bam</i> HI RP                | 5'-CGGGATCCTACAAAGAAAGGTTCTTCTTGA-3'  |
| 711 <i>Eco</i> RI- <i>Phf1</i><br>401aa FP               | 5'-CGAATTCGTATGTTTCGCTGTGTGTGGC-3'    |
| <b>BDP-1 constructs</b>                                  |                                       |
| 420 <i>MfeI</i> -<br><i>Bdp1</i> (NCU08809)<br>2aa FP    | 5'-ATCCAATTGGACATGAGTGCCTCGCCTAC-3'   |
| 421<br><i>Bdp1</i> (NCU08809)<br>478aa <i>Bam</i> HI RP  | 5'-CGGGATCCTAGTTAGATCCCTCTTGGC-3'     |
| 514 <i>MfeI</i> -<br><i>Bdp1</i> (NCU08809)<br>198aa FP  | 5'-ATCCAATTGGAGTACCGCCGAATCACAAA-3'   |
| 515<br><i>Bdp1</i> (NCU08809)<br>236aa <i>Ban</i> HI RP  | 5'-CGGGATCCTAGTAATCGGCCGCCAGGAAA-3'   |
| 615<br><i>Bdp1</i> (NCU08809)<br>361aa <i>Bam</i> HI RP  | 5'-CGGGATCCTACAGTTTCTTGGAGGTGGTAA-3'  |
| 691 <i>Eco</i> RI-<br><i>Bdp1</i> (NCU08809)<br>45aa FP  | 5'-CGAATTC AACGAGACACACGATGACCA-3'    |
| 707 <i>Eco</i> RI- <i>Bdp1</i><br>45aa FP                | 5'-CGAATTC AACGAGACACACGATGACCA-3'    |
| 708 <i>Bdp1</i> 236aa<br><i>Bam</i> HI RP                | 5'-CGGGATCCTAGTAATCGGCCGCCAGGAAA-3'   |

1 **Supplemental Figure 1. Schematic representation of human, *S. pombe*, and Neurospora**  
2 **LSD1 homologs with predicted domains and amino acid lengths.**

3

4 **Supplemental Figure 2.  $\Delta$ *lsd1* strains exhibit hyper DNA methylation at select loci genome-**  
5 **wide.**

6 WGBS tracks displaying DNA methylation in WT (blue) and  $\Delta$ *lsd1* (red) strains across all  
7 Neurospora linkage groups.

8

9 **Supplemental Figure 3. H3K9me1 and -me3 in  $\Delta$ *lsd1* strains.**

10 Western blot analysis of H3K9me1 in WT,  $\Delta$ *dim-5*, and  $\Delta$ *lsd1* cell extracts (left panel) and  
11 H3K9me3 in WT,  $\Delta$ *dim-5*,  $\Delta$ *dim-2*,  $\Delta$ *lsd1*, and  $\Delta$ *lsd1*;  $\Delta$ *dim-2* cell extracts (right panel). Cell  
12 extract from *S. cerevisiae*, which possesses no methylation on lysine 9 of histone H3, is included  
13 as a negative control for H3K9me1. hH3 levels are included as a loading control for both blots.

14

15 **Supplemental Figure 4. Coimmunoprecipitation and yeast two-hybrid analysis of LSDC**  
16 **members.**

17 (A) Coimmunoprecipitation analysis of LSDC members. Pull downs were performed with  
18 antibodies to epitopes on indicated proteins.

19 (B) Summary of results of yeast two-hybrid analysis of PHF1 and BDP-1. PHF1 fragments were  
20 fused to the GAL4 DNA binding domain and co-expressed with full length BDP-1 fused to the  
21 GAL4 activation domain (left), or full length PHF1 was fused to the GAL4 DNA binding  
22 domain and co-expressed with BDP-1 fragments fused to GAL4-activating domain (right). All  
23 constructs were co-transformed into PJ69-4A yeast, and transformants were tested on SD agar  
24 plates without Ade, His, Leu, and Ura. Growth results are at the left of each fragment schematic.

25

26 **Supplemental Figure 5.  $\Delta$ *lsd1* strains exhibit variable extents of hyper DNA methylation.**

27 (A) WGBS tracks showing variable hyper DNA methylation in replicate bisulfite sequencing of  
28 the same  $\Delta$ *lsd1* strain (red) and three different asexually-propagated  $\Delta$ *lsd1* strains (black). DNA

29 methylation-sensitive Southern hybridization analysis of Tel VIII and NCU02455 and the  
30 pedigree of the  $\Delta lsd1$  strains are presented in Figure 2B.

31 **(B)** DNA methylation-sensitive Southern hybridization analysis of LSD complex double  
32 knockout siblings with the indicated probes. Strains (left to right): N3753, N4711, N5555,  
33 N6414, N6416, N6272, N8109, N8110, N8111, N8112, N6271, N8105, N8106, N8107, and  
34 N8108.

35 **(C)** Ascospore germination rates of heterozygous and homozygous  $\Delta lsd1$  strain crosses.

36

37 **Supplemental Figure 6.  $\Delta lsd1$  strains exhibit DNA methylation-dependent hyper H3K9me3.**

38 **(A)** ChIP-qPCR validation of H3K9me3 ChIP-seq from Figure 3A. qPCR amplicons are  
39 displayed as red bars above H3K9me3 ChIP-seq tracks from Figure 3A. H3K9me3 enrichment  
40 was normalized to antibody-specific background levels at the histone H4 gene, *hH4*. Quadruple  
41 asterisks indicate  $p < 0.0001$ .

42 **(B)** Metaplot displaying the averaged profile of H3K9me3 enrichment in WT and  $\Delta lsd1$  strains  
43 as determined by ChIP-seq over identified  $\Delta lsd1$ -sensitive regions.

44

45 **Supplemental Figure 7. *lsd1-3xFLAG* Neurospora strains exhibit slight hyper DNA  
46 methylation, but less so than catalytic-null *lsd-3xFLAG* strains.**

47 **(A)** DNA methylation-sensitive Southern hybridization analysis comparing DNA methylation  
48 levels in catalytic null LSD1-3xFLAG strains (indicated by an asterisk) and WT LSD1-3xFLAG  
49 siblings at two  $\Delta lsd1$ -sensitive regions. Strains (left to right): N3753, N4711, N5555, N7943,  
50 N7944, N7945, N7946, N7899, N6300, N8040, N8041, N8042, N8043, N8044, N8045, N8046,  
51 N8047, N8048, N8049, N8050, N8051, N8052, N8053, N8054, N8055, N8056, N8057, N8058,  
52 N8059, N8060, N8061, N8062, N8063, N8064, N8065, N8066, N8067, and N8068.

53 **(B)** ChIP-seq tracks showing H3K9me3 enrichment in WT,  $\Delta lsd1$ , and catalytic null (indicated  
54 by an asterisk) *lsd1* strains at selected  $\Delta lsd1$ -sensitive regions.

55 **Supplemental Figure 8. Modest changes in gene expression in regions hypermethylated in  
56  $\Delta lsd1$  strains.**

57 (A) RT-qPCR results showing mRNA levels of indicated genes that become methylated in  $\Delta lsd1$   
58 methylated strains.

59 (B) WGBS and H3K4me3 ChIP-seq tracks showing DNA methylation and H3K4me3  
60 enrichment, respectively, in indicated strains over the selected genes in illustrated in panel A.

61

62 **Table S1. LSD1-associated proteins.**

63

64 **Table S2. PHF1-associated proteins.**

65

66 **Table S3. BDP-1-associated proteins.**

67

68 **Table S4. Putative lysine methyltransferase KOs screened for loss of H3K9me1 in  $\Delta dim-5$**   
69 **background.**

70

71 **Table S5. List of genes downregulated in  $\Delta lsd1$ .**

72 Methylated genes identified by bisulfite sequencing are in yellow.

73

74 **Table S6. List of genes upregulated in  $\Delta lsd1$ .**

75

76 **Table S7. Strains used in this study.**

77

78 **Table S8. Primers used in this study.**

79
